# Supplementary material
Source: Springer Nature journal article supplement (https://www.springermedizin.de/resource/supplementary/12913_2011_1897_MOESM3_ESM.pdf/9529184)
Supplement: MOESM3 [file 9529184]

**Baseline measures**

1170 patients eligible based on chart review

261 refused  
192 no contact  
250 visit conflict  
188 No RA available  
93 Other

186 patients agreed to participate

21 ineligible  
(CHD risk <6%)

165 participants randomized

**Primary study visit**

2 false inclusions\*

3 false inclusions\*

81 intervention  
**(Decision aid intervention)**  
2 visit no shows

79 control  
**(Usual care)**  
1 visit no show

**Follow-up visit**

**Adherence messages**

2 declined further participation

1 declined further participation

77 intervention

77 control
